# Supplementary material for: Brucellosis involving the aorta and iliac arteries: a systematic review of 130 cases
Source: Front Bioeng Biotechnol. 2023 Nov 30;11:1326246. doi: 10.3389/fbioe.2023.1326246 (PMC10720085; doi:10.3389/fbioe.2023.1326246)
Supplement: Supplementary file 1 [file Table1.XLSX]

## Sheet: Sheet1
Table S1: Overview of characteristics, diagnostics, treatment and outcomes of patients with aorto-iliac involvement in brucellosis Sort references by year of publication
Reference	Clinical details (sex - age (y) -country)	Transmission/occupation (country)	Comorbidity and/or risk factors	Symptoms (duration)	Brucella species	Blood culture	Biopsy culture	Serology	Anatomical location	Type of aorto-iliac manifestation	Other site manifestations	Antibiotic treatment [duration]	Surgical treatment	Outcome
Hart et al.18 1951	Male – 48 – U.K.	Farmer (U.K.)	Rheumatic aortic stenosis	Malaise & fatigue (1y), palpitations (6mo) and shivering (3w)	B. abortus	+	+	+	Ascending thoracic aorta	Ulcerative process and fistula between sinuses of Valsalva	Endocarditis (aortic valve) Splenic infarcts	Penicillin 2x106 U/d [11d], oral aureomycin 2g/d [25d] and streptomycin 5 x 105 U [18d]	No surgery performed	Died (5mo later due to PE)
Peery and Belter19 1960 2 cases	Male – 63 – U.S.A.	NR	NR	Fever and shivering (15mo)	B. Abortus	+	NR	NR	Ascending thoracic aorta	Ulcerative process and fistula between sinuses of Valsalva	Endocarditis (aortic valve) Splenic/brain infarcts	-	No surgery performed	Died (10d after admission)
	Male – 59 – U.S.A.	Farmer (U.S.A.)	NR	Fever, weight loss and shivering (15mo)	B. Abortus	+	NR	NR	Ascending thoracic aorta	Aortitis	Endocarditis (aortic valve) Splenic infarcts	-	No surgery performed	Died (unspecified)
Bennett et al.20 1967	Male – 60 – U.S.A.	Farmer (U.S.A.)	Atherosclerosis	Fever, weight loss, shivering, pain left hip (10mo)	Not specified	-	NR	+	Infrarenal abdominal aorta	Ruptured saccular infected aneurysm (7x6x4 cm)	Left iliac artery thrombosis, abdominal lymph node, liver	Intravenous penicillin [NR]	Explorative laparotomy	Died (3h postoperatively)
Golden et al.21 1970	Male – 23 – U.S.A.	Butcher (U.S.A.)	NR	Brucellosis (2mo)	B. suis	+	-	+	Ascending thoracic aorta	Infected aneurysm	Endocarditis (aortic valve) Splenic infarcts	Streptomycin 1gx2, tetracycline 500mgx4, sulfadiazine & chloramphenicol [NR]	Aneurysm resection and aortic valve replacement	Died (38d later due to multi-organ failure)
Quilichini et al.22 1974 2 cases	Male – 45 – France	NR	NR	Brucellosis (3mo)	Not specified	-	+	+	Infrarenal abdominal aorta	Ruptured infected aneurysm	Spondylodiscitis	NR	Aneurysm resection and Dacron graft replacement	NR
	Male – 57 – France	NR	Atherosclerosis	Brucellosis (5mo)	Not specified	NR	NR	+	Infrarenal abdominal aorta	Ruptured infected aneurysm	Abdominal lymph nodes	NR	Aneurysm resection and Dacron graft replacement	NR
Cros et al.23 1975	Male – 67 – France	NR	Atherosclerosis Obesity	Fever & weight loss (4mo), pain in lower back (1mo)	Not specified	-	+	+	Infrarenal abdominal aorta	Ruptured saccular infected aneurysm	Spondylodiscitis L3- L4	Terramycin [NR]	Aneurysm resection and Dacron graft replacement	Died (3d later due to myocardic necrosis)
Fudge et al.24 1976	Male – 53 – U.S.A.	Farmer (U.S.A.)	Atherosclerosis Steroids	Abdominal pain, subfebrile temperature	B. suis	+	+	+	Descending thoracic & infrarenal abdominal aorta	Infected aneurysms (thoracic = 4.5 x 3.5 cm)	Superior mesenteric artery aneurysm (2.5cm)	Dox [6mo]	Aneurysm resection and Dacron graft replacement	Cured (FU 1y)
Colonna and Cristallo25 1978	Female – 49 – Italy	NR	NR	Fever and pain in lumbar spine (1y)	Not specified	NR	NR	+	Ascending thoracic aorta	Dissecting aneurysm	PE and deep venous thrombosis	NR	No surgery performed	Died (2d postoperatively due to intestinal bleeding)
Gillet et al.26 1983 2 cases	Male – 40 - France	Farmer (France)	Hypertension	Fever and abdominal pain	B. Abortus	+	-	+	Infrarenal abdominal aorta	Ruptured infected aneurysm	Spondylodiscitis L3-L4 Paravertebral lymphadenopathy	Dox [3mo]	Aneurysm resection and Dacron graft replacement	Cured (FU 7y)
	Male – 51 - France	Chef (France)	Atherosclerosis	Pain in lumbar spine	Not specified	-	NR	+	Infrarenal abdominal aorta	Ruptured infected pseudo-aneurysm	Spondylodiscitis L4-L5 Bilateral psoas abscesses	Dox + rif [NR]	Aneurysm resection and Dacron graft replacement	Cured (FU 1.5y)
Cueto Garcia et al.27 1983	Male – 30 – Mexico	NR	NR	NR	B. Abortus	NR	NR	NR	Ascending thoracic aorta	Dissection	Endocarditis (aortic valve)	NR	Valve replacement and aortoplasty	Cured (FU NR)
Aguado et al.28 1987	Male – 69 – Spain	Cattle breeder (Spain)	NR	Fever and malaise (10y)	B. Melitensis	-	+	+	Infrarenal abdominal aorta	Ruptured infected aneurysm (6 x 4 cm)	Spondylodiscitis	Dox [6mo] and streptomycine [21d]	Resection of aneurysm and axillo-bifemoral bypass	Cured (FU 1.5y)
Pressl et al.29 1990	Female – 42 – France	NR	NR	Thoracic pain and shock	B. Melitensis	NR	+	+	Ascending thoracic aorta	Ulcerative process	Endocarditis (aortic valve)	NR	Bentall procedure	Cured (FU NR)
al Kasab et al.30 1990 3 cases	Male – 45 – S.A.	NR	Rheumatic fever	NR	B. Melitensis	+	+	+	Ascending thoracic aorta	Root abscess	Endocarditis (aortic valve) Fistula to right ventricular outflow tract	Intravenous gentamicin [6w], rif [12w] and dox [12w]	No surgery performed	Cured (FU NR)
	Male – 35 – S.A.	NR	Rheumatic fever	Fever and weight loss (3w)	B. melitensis	+	+	+	Ascending thoracic aorta	Root abscess	Endocarditis (aortic valve)	Intravenous netilmicin [6w], dox [12w] and cefotaxime [12w]	No surgery performed	Cured (FU NR)
	Male – 25 – S.A.	NR	NR	Brucellosis, fever and arthralgia (5mo)	B. Melitensis	+	-	+	Ascending thoracic aorta	Root abscess	Endocarditis (aortic valve)	No antibiotics	No surgery performed	Died (1d due to cardiac arrest)
Bergeron et al.31 1992	Male – 48 – France	NR	Nicotine abuse	Fever and lumbosciatic pain	B. suis	-	NR	+	Juxtarenal abdominal aorta	Ruptured infected aneurysm	Spondylodiscitis L5-S1	Tetracycline [NR]	Resection of aneurysm and prosthetic Dacron graft replacement	Cured (FU after 0.5y NR)
Kumar et al.32 1993	Male – 11 – S.A.	Camel breeder (S.A.)	Congenital heart disease	Undulant fever and weight loss (4mo)	B. Melitensis	+	NR	+	Ascending thoracic aorta	Infected aneurysm	Endocarditis (aortic valve)	Streptomycine, rif and tetracycline [7w]	Excision of abscess and reconstruction	Cured (FU after 2y NR)
Gross et al.33 1994	Female – 40 – Austria	NR	NR	Thoracic pain and shock	Not specified	-	-	+	Ascending thoracic aorta	Infected aneurysm (5 cm)	Endocarditis (aortic valve)	Not specified antibiotics: - Intravenous [6w] - Oral [3mo]	Valve excision, aneurysm resection and graft replacement	Cured (FU after 5y NR)
Sanchez_x0002_Gonzalez et al.34 1996	Male – 65 - Spain	Farmer and consumption raw milk (Spain)	NR	Fever, sweating and lumbar pain (5mo)	B. Melitensis	+	NR	+	Infrarenal abdominal aorta	Aortitis and thrombosis	Spondylodiscitis L4-L5 Psoas abscesses	Dox + rif [NR]	Axillo-bifemoral artery bypass	Died (6h postoperatively due to mesenteric ischemia)
Yee and Roach35 1996	Male – 66 – Mexico	Farmer (Mexico)	NR	Fever, weight loss and back pain	B. Melitensis	NR	+	NR	Infrarenal abdominal aorta	Ruptured infected aneurysm	Spondylodiscitis L2-L3 Occlusion right common iliac artery	NR	Axillo-bifemoral bypass	NR
Blain et al.36 1997	Male – 65 – France	NS (Morocco)	NR	Fever, hemoptysis, lumbar pain	B. Melitensis	+	+	+	Descending thoracic aorta	Ruptured infected aneurysm	Spondylodiscitis L5-S1 Aortobronchial fistula	Ofloxacin, dox and streptomycine [NR]	Aortic graft resection and Dacron graft replacement	Cured (FU after 1.5y NR)
Cano Trigueros et al.37 1997	Male – 60 – Spain	Breeder (Spain)	NR	Hematemesis, brucellosis, lumbar pain	Not specified	NR	+	+	Infrarenal abdominal aorta	Infected pseudo_x0002_aneurysm	Aortoduodenal fistula	Not specified [6mo]	Aortic ligation and axillo-bi_x0002_femoral bypass	Cured (FU after 2y NR)
Peláez Fernández et al.38 1999	Male – 74 – Spain	Farmer (Spain)	Hypertension	Fever and lumbar pain (4mo)	Not specified	NR	NR	+	Infrarenal abdominal aorta	Contained ruptured infected aneurysm (8x8 cm)	NR	Dox + streptomycine [NR]	Aorto-bifemoral bypass	Cured (FU after 14d NR)
Shehata et al.39 2001	NR	NR	NR	Brucellosis (9mo)	Not specified	+	NR	NR	Infrarenal abdominal aorta	Infected aneurysm	NR	NR	NR	NR
Rousie et al.40 2004	Male – 72 – Belgium	Traveller (Sicily)	NR	Abdominal pain(1mo)	Not specified	+	+	NR	Infrarenal abdominal aorta	Infected aneurysm (4.5 cm)	-	Rif + dox [6w]	Aneurysm resection and graft replacement	Cured (FU after 15mo NR)
Alhyari et al.41 2005	Male – 46 – Jordan	Farmer (Jordan)	NR	Fever, weight loss and arthtralgias (2mo)	Not specified	-	-	+	Ascending thoracic aorta	Aortic root abscess (3cm)	Endocarditis (aortic valve) Splenic infarcts	Intravenous gentamicin [3w], oral rif and dox [6mo]	Aortic valve replacement	Cured (FU at 30mo NR)
Quaniers et al.42 2005	Male – 72 – Belgium	Unpasteurised goat’s milk cheese (Italy)	Atherosclerosis	Abdominal pain	B. Melitensis	+	+	+	Infrarenal abdominal aorta	Ruptured infected aneurysm	-	Intravenous gentamicin and Dox [14d], oral rif and dox [6mo]	Bifurcated Dacron prosthetic graft	Cured (FU after 30mo NR)
Tsioufis et al.43 2006	Female – 78 – Greece	NR	Hypertension	Brucellosis (2y)	B. Melitensis	NR	-	NR	Ascending thoracic aorta	Infected aneurysm	-	NR	Aneurysmectomy	Cured (FU after 6mo NR)
Biyik et al.44 2007	Male – 38 – Turkey	Farmer (Turkey)	Heart failure	Pancarditis	Not specified	-	NR	NR	Ascending thoracic aorta	Root abscess and dissection	Endocarditis Fistula between aorta and right ventricle	Intramuscular streptomycin 2g/d, oral dox 200mg/d, rif 900mg/d and ciprofloxacine 1500mg/d [14d]; Oral dox 200mg/d, rif 600mg/d and ciprfoloxacine 1g/d [NR]	Fistula closure	Died (after 1y due to heart failure)
Bul et al.45 2007	Male – 66 – the Netherlands	Traveller (Syria)	Atherosclerosis	Fever, weight loss and lumbar pain (2mo)	B. Melitensis	+	+	+	Infrarenal abdominal aorta	Ruptured (non_x0002_dilated) aorta	-	Dox + rif: - Intravenous [14d] - Oral [7d]	1. Prosthetic graft 2. Bioprothesis 3. Extra-anatomical bypass	Died (multi-organ failure after 2 re_x0002_operations)
Park et al.46 2007	Male – 59 – Korea	Abattoir worker (Korea)	Alcohol abuse	Fatigue and chills (2mo)	B. Abortus	+	NR	NR	Infrarenal abdominal aorta	Infected aneurysm	-	Ciprofloxacine [28d], dox and rif [2mo]	Bifurcated PTFE graft bypass	Cured (FU after 22mo NR)
Kusztal et al.47 2007	Male – 61 – Poland	Veterinarian (Poland)	Steroid use	Brucellosis	Not specified	NR	NR	+	Descending thoracic aorta to iliacs	Dissecting aneurysm	Glomerulonephritis	NR	Endovascular stent graft	Alive (FU after 6mo NR)
Kokkinis et al.48 2008	Male – 65 – Greece	Goat and sheep breeder (Greece)	Atherosclerosis	Brucellosis (2y)	B. Melitensis	-	+	-	Infrarenal abdominal aorta	Infected aneurysm	Psoas and retroperitoneal abscess, deep venous thrombosis	Not specified antibiotics [NR]	Endovascular stent graft and abscess drainage	Cured (FU after 11mo NR)
Wolff et al.49 2009	Male – 59 – Switzerland	Traveller (North Macedonia)	Atherosclerosis Nicotine abuse	Weight loss and suprapubic pain (6w)	Not specified	+	+	NR	Infrarenal abdominal aorta	Infected aneurysm (3.9 cm)	-	Dox and gentamicin [14d]; rif 900mg/d and dox 200mg/d [6mo]	PTFE bifurcated prosthesis	Cured (FU after 2y NR)
Ahmed et al.50 2010	Male – 17 – Sudan	NR	No history	Fever and fatigue	B. Melitensis	-	+	+	Ascending thoracic aorta	Root abscess	Endocarditis (aortic valve)	Not specified antibiotics [2w preoperative]	Aortica valve replacement	Cured (FU after 18mo NR)
Bakhos et al.51 2010	Male – 74 – U.S.A.	Traveller (Iran)	Atherosclerosis	Epigastric and back pain, hemoptysis	B. Melitensis	+	NR	+	Descending thoracic aorta	Ruptured intramural hematoma	Aortobronchial fistula Aortoesophageal fistulas	Intravenous gentamicin, dox and cefotaxime [2w]; rif and ciprofloxacine [NR]	1. Endovascular graft 2. Resection with interposition graft	Cured (FU after 10mo NR)
Jun Park et al.52 2010	Male – 70 – Korea	Cattle breeder (Korea)	Hypertension Alcohol abuse	Brucellosis, back pain	Not specified	NR	NR	+	Infrarenal abdominal aorta	Infected aneurysm	NR	Doxycycline 100mg 2/day and rif 600mg 2/day [10w]	Endovascular aneurysm repair	Cured (FU after 14mo NR)
Kwon et al.53 2010	Male – 59 – Korea	NR	Diabetes	NR	B. Abortus	+	-	NR	Infrarenal abdominal aorta	Ruptured infected aneurysm (2.9 cm)	-	Rif [4mo]	Aneurysm resection and bifurcated PTFE	Cured (FU after 3.5y NR)
Sasmazel et al.54 2010	Male – 77 – Turkey	NR	NR	NR	Not specified	NR	NR	+	Ascending thoracic aorta	Infected aneurysm	Endocarditis (aortic valve)	Rif 900mg/d, doxycycline 200mg/d and cefotaxime 15mg/kg [6w]	Aortic valve replacement and ascending graft interposition	Cured (no FU)
Amirghofran et al.55 2011	Male – 39 – Iran	Veterinarian (Iran)	Hypertension	Brucellosis	Not specified	+	+	+	Ascending thoracic aorta	Dissection, root abscess and infected pseudo_x0002_aneurysm	Endocarditis (aortic prosthetic valve)	Gentamicin [30d], ciprofloxacine and rif [10mo]	1. Bentall procedure 2. Dacron graft	Cured (FU after 18mo NR)
Benedetto et al.56 2011	Male – 80 – Italy	NR	NR	Suprapubic pain (1w)	Not specified	-	-	+	Infrarenal abdominal aorta	Ruptured infected aneurysm (2.9cm)	Spondylodiscitis L3-L4 Psoas abscesses	Intravenous rif 600mg 2/day and dox 100mg 2/day [1mo]; then oral [9mo]	Endovascular aneurysm repair	Cured (FU after 18mo NR)
Cascio et al.17 2011 2 cases	Male – 67 – Italy	NR	NR	Brucellosis (2mo)	Not specified	-	-	+	Infrarenal abdominal aorta	Infected aneurysm	Spondylodiscitis L4-L5 Right iliac artery aneurysm	Dox 100mg 2/day and rif 600mg 2/day [9mo]	Aneurysm resection and bifurcated PTFE	Cured (FU after 2y NR)
	Female – 79 – Italy	NR	Dyslipidemia	Fever, weight loss and back pain (4mo)	Not specified	-	-	+	Infrarenal abdominal aorta	Ruptured infected aneurysm (11x11 cm)	Spondylodiscitis L4-L5 Psoas abscesses	Intravenous rif 600mg 2/day and dox 100mg 2/day [1mo]	Aneurysm resection and Dacron graft replacement	Died (30d due to peritonitis
Jariwala57 2013	Male – 45 – India	Farmer (India)	NR	Fever with chills (2w)	Not specified	+	-	-	Ascending thoracic aorta and root	Aortitis	Endocarditis (aortic valve)	Doxycycline 100mg 2/day, rif 450mg and streptomycine 1g intramuscular 2/day [NR]	No surgery performed	Died (due to refractory heart failure)
Kakkos et al.88 2013	Male – 66 – Greece	Farmer (Greece)	Hypertension, left carotid artery stenosis and hyperlipidemia	Atypical lower back pain (6w)	B. Melitensis	-	+	+	Abdominal aorta and both CIA	Infected aneurysm	-	Intravenous gentamicin 5mg/kg, oral doxycycline 100mg 2/day [3w]; followed by meropenem 1g 3/day, vancomycine 1g 2/day and fluconazole 400mg 1/day [3w]; followed by dox 100mg 2/day, ciprofloxacine 500mg 2/day and rif 600mg 1/day [6mo]	Aorto-bi-iliac graft	Cured (1y FU)
Goudard et al.58 2013	Female – 56 – France	Artisan cheese (Portugal)	Tuberculosis Nicotine abuse	Recurrent abdominal pain and weight loss (3m)	B. Melitensis	+	+	+	Infrarenal abdominal aorta	Infected aneurysm	-	Intravenous gentamicin, oral dox and rif [15d]; followed by oral rifampicin and dox [3m]	Aneurysm resection and PTFE	Cured (8y FU)
Rimar et al.59 2013.	Male – 58 – Israel	Unpasteurized goat cheese (Israel)	NR	Fever and necrotizing palpable purpura (1w) and lower back pain (1y)	B. Melitensis	-	-	+	Abdominal aorta	Aortitis	Osteomyelitis, cutaneous leukocytoclastic vasculitis, psoas abscess	Intravenous gentamicin [2w], oral dox 200mg/day and rif 600mg/day [6m]	No surgery performed	Cured (6mo FU)
Herrick et al. 1 2014.	Male – 73 – U.S.A.	Abattoir worker (Ecuador)	Chronic anemia infrarenal aortic aneurysm and hypertension	Accelerating angina pectoris (2mo) and fever (1d)	B. Abortus	+	-	+	Ascending thoracic aorta	Penetrating aortic ulcer	-	Intravenous gentamicin [2w], oral dox 200mg/day and rif 600mg/day [lifelong therapy]	Ulcer resection and prosthetic graft replacement	Cured (15mo FU)
Korkut et al.60 2015	Male – 68 – Turkey	NR	NR	Leg pain (2mo)	Not specified	NR	NR	+	Infrarenal abdominal aorta	Aortic occlusion (thrombus) and psoas abscess	NR	Doxycycline and rif [3mo]	No surgery performed; only abscess drainage	Cured (no FU reported)
Sabzi et al.61 (J Cardiovasc) 2015	Male – 26 – Iran	NR	NR	Chest pain and hypotension (2w)	B. Melitensis	+	NR	+	Ascending thoracic aorta	Aortic wall fistula and abscess	Endocarditis (aortic valve)	Ceftriaxone 2g and gentamicin 3mg/kg preoperatively; intravenous gentamicin 3mg/kg 2/day, oral doxycycline 100mg 2/day and rif 600mg 1/day [6w]	Prosthetic valve replacement and resection of aortic wall and replacement with fresh pericardial patch	Cured (FU only 15d at discharge)
Sabzi et al.62 (Adv Biomed Res) 2015	Male – 34 – Iran	NR	NR	Fever, malaise, fatigue and weight loss	B. Melitensis	+	NR	+	Ascending thoracic aorta	Aortopulmonary fistula, root abscess, vegetation and cavity formation	Endocarditis (aortic valve)	Intramuscular streptomycine 1g 1/day [3w], oral dox 100mg 2/day and rif 900mg 1/day [7d]. Not specified antibiotics [2mo]	Aortic valve replacement and transpulmonary fistula repair	Cured (1y FU)
Alhaizaey et al.63 2016 2 cases	Female – 60 – S.A.	Farmer consuming raw milk (S.A.)	Type III chronic spontaneous aortic dissection	Fever, joint and back pain (8w). Abdominal pain on admission (3d).	B. Melitensis	NR	+	+	Infrarenal abdominal aorta	Infected aneurysm (6 x 6 cm)	NR	Aminoglycoside, dox and rifampicin [NR]	Aneurysm resection and aortobi-iliac graft	Cured (1y FU)
	Male – 83 – S.A.	Unpasteurized milk (S.A.)	NR	Fever, joint and back pain (3mo). Abdominal pain on admission (3d)	Not specified	NR	NR	+	Infrarenal abdominal aorta	Infected aneurysm (3.8 cm)	NR	Doxycycline and rif [6mo]	No surgery performed	Alive (6mo FU)
Bayhan et al.64 2016	Male – 12 - Turkey	Cattle breeder and consuming unpasteurized milk (Turkey)	NR	Headache and difficulty walking	B. Melitensis	+	NR	+	Ascending thoracic aorta	Aortitis	Endocarditis	Intravenous ceftriaxone 100mg/kg [26d] and gentamicin 5mg/kg [2w], oral rif 20mg/kg and doxycycline 4mg/kg [10mo]	No surgery performed	Cured (10mo FU)
Chen et al.65 2017	Male – 71 – U.S.A.	Traveller (Mexico)	Atrial fibrillation Stroke	Shortness of breath and malaise	B. Melitensis	+	NR	NR	Descending thoracic aorta and infrarenal abdominal aorta	Ruptured infected aneurysms	NR	Gentamicin [4w], rif (ciprofloxacin) [6w] and dox [indefinitely]	Multiple endovascular stent grafts	Cured (9mo FU)
Fuchs et al.66 2017	Male – 69 – Israel	Bedouin (Israel)	Bladder carcinoma	Dysphagia, abdominal pain and weight loss (1mo)	B. Melitensis	+	NR	+	Descending thoracic aorta	Infected aneurysm (8.2 cm)	NR	Vancomycin and ciprofloxacin [NR]; followed by intravenous gentamicin and oral dox 100mg 2/day [1y].	Endovascular stent graft (TEVAR)	Cured (3y FU)
Ghosh et al.67 2017	Male – 38 – India	Dairy industry (Middle East)	NR	Dyspnoea (25d), fever, malaise and weight loss (6mo)	Not specified	-	NR	+	Ascending thoracic aorta	Infected pseudo_x0002_aneurysm (6.4 x 4.0 x 3.6 cm)	Endocarditis	Streptomycin and dox [2w]	NR	NR
Wang et al.68 2017	Male – 65 – China	Cattle and raw meat (China)	No relevant history	Intermittent fever and chest pain (2mo)	Not specified	+	NR	+	Descending thoracic aorta	Ruptured pseudo_x0002_aneurysm (5.4 cm)	NR	Dox 200mg and rif 450mg 2/day [26w]	Endovascular covered stent graft	Cured (0.5y FU)
Zhang et al.69 2017	Male – 63 - China	Goat breeder (China)	NR	Fever, abdominal pain and fatigue (10d)	Not specified	-	+	+	Infrarenal abdominal aorta	Infected pseudo_x0002_aneurysm (5.2 x 3.0 cm)	-	Levofloxacin and vancomycin [NR]; followed by dox 100mg 2/day and rif 600mg [6w]	EVAR	Cured (10mo FU)
Li et al.70 2019	Female – 73 - China	Ingestion of sheep placenta (China)	NR	Fever, malaise, night sweats, joint/muscle discomfort	B. Melitensis	+	NR	NR	Infrarenal abdominal aorta	Infected aneurysm (3.8 cm)	NR	Intravenous gentamicin 300mg [6w], ceftriaxone 1g 2/day [6w] and dox 100mg 2/day and rifampicin 300mg 2/day [indefinitely]	Endovascular bifurcated stent graft	Alive (FU NR)
Ramachandran et al.71 2019	Female – 49 – India	Consumption unpasteurized milk (India)	No relevant history	Fever, malaise, weight loss (1mo) and abdominal pain (2w)	B. Melitensis	+	+	NR	Infrarenal abdominal aorta	Ruptured infected aneurysm (8.0 cm)	NR	Dox and rif [NR]	Aorta-bi-femoral bypass PTFE graft	Cured (9d FU)
Alsheef et al.72 2019	Male – 52 – S.A.	Unpasteurized milk and animal contact (S.A.)	Diabetes mellitus type 2	Fever, chills, wieght loss and dysphagia (3mo)	B. Melitensis	+	NR	NR	Descending thoracic aorta	Infected aneurysm	Aortoesophageal fistula	Intravenous gentamicin [16d], dox and rif [6mo]	Endovascular stent graft	Died (due to hypovolemic shock)
Wu et al.73 2019	Male – 65 – U.S.A.	Feral swine hunting (U.S.A.)	Hypertension Hyperlipidemia	Hemoptysis	B. suis	+	+	NR	Descending thoracic aorta	Infected aneurysm (5.0 cm)	Aortobronchial fistula	Intravenous dox 100mg [6w]	1. TEVAR 2. Aneurysm resection and Dacron graft replacement
Tosatto et al.74 2020	Male – 66 – Portugal	Consumption unpasteurized milk (Portugal)	NR	Intermittent night sweating, weight loss (few months)	B. Melitensis	+	+	-	Abdominal aorta	Ruptured infected aneurysm	NR	Dox 100mg 2/day and rif 600mg 2/day [NR]	Endovascular endoprothesis
Joghataie et al.75 2021	Female – 24 – Iran	NR	No relevant history	Brucellosis	Not specified	+	NR	NR	Thoracic and abdominal aorta	Aortitis	NR	NR	NR	NR
El Yaagoubi et al.76 2021	Male – 66 – France	Direct contact with sheep (France)	Aortic aneurysm treated by EVAR	No symptoms	B. Melitensis	NR	+	NR	Abdominal aorta	Infected aneurysm	NR	Antibiotics; not specified	1. Removal of EVAR 2. Excision of aneurysm and aorto-iliac bypass	NR
Liu et al.77 2021	Male – 55 – China	Livestock farmer (China)	Brucellosis with fever and arthralgia (9mo)	Short of breath (few weeks)	Not specified	-	NR	+	Ascending thoracic aorta	Infected pseudo_x0002_aneurysm of the anterior sinus of Valsalva	Endocarditis	Antibiotics; not specified	Aortic valve replacement and excision of pseudoaneurysm with pericardial patch	Cured (6mo FU)
Willems et al.89 2021	Male – 79 – the Netherlands	Traveller and consumption unpasteurized milk (Turkey)	Abdominal aneurysm and right common iliac artery aneurysm	Acute abdominal pain	B. Melitensis	+	+	-	Right common iliac artery	(Contained) ruptured infected aneurysm (4.0 cm)	Abscess formation around the endovascular stent	1: Flucloxacillin [2w]; later intravenous cefuroxime and metronidazole 2: After culture intravenous gentamicin, oral dox and rif/co_x0002_trimoxazole [6mo]	1. EVAR 2. Neo-aortoiliac system reconstruction with bilateral femoral veins	Cured (1y FU)
Yu et al.13 2021	Male – 60 – China	NR	Hypertension	Abdominal pain	B. Melitensis	+	NR	+	Abdominal aorta	Pseudoaneurysm	NR	Dox 100 mg/ time twice /d + Rif 600 mg/ time once /d (NR)	Resection of abdominal aortic aneurysm with autogenous repair of posterior sheath of rectus abdominis	Cured (1y FU)
Wang et al.14 2021 4 cases	Male – 62 – China	Sheep (China)	NR	Fever, abdominal pain	Not specified	NR	NR	+	Abdominal aorta	Arterial aneurysm	NR	Rif + dox (13mo)	EVAR	Cured (30mo FU)
	Male – 70 – China	Sheep (China)	NR	Fever, abdominal pain	B. Melitensis	+	NR	+	Left iliac artery	Pseudoaneurysm	NR	Rif + dox (7mo)	EVAR	Cured (NR)
	Male – 66 – China	Sheep (China)	NR	Fever, abdominal pain	-	-	NR	+	Abdominal aorta	Arterial aneurysm	NR	Rif + dox (12mo)	EVAR	Cured (NR)
	Male – 61 – China	Sheep (China)	NR	Fever, abdominal pain	-	-	NR	+	Right iliac artery	Pseudoaneurysm	NR	Rif + dox (7mo)	EVAR	Cured (NR)
Li et al.86 2022	Male – 67 – China	Cattle (China)	Hypertension, diabetes	Pain in left waist and hip	Not specified	+	NR	+	Thoracic aorta and abdominal aorta	Pseudoaneurysm, arterial ulcer	NR	Rif + dox (NR)	EVAR + TEVAR	Cured (6w FU)
YE et al.78 2022 9 cases	Male – 68 – China	Farmer, Contact with cattle and sheep (China)	Smoking	Fever, abdominal pain	Not specified	+	NR	+	Abdominal aorta	Pseudoaneurysm	NR	Rif 600mg, once /d+ dox 100mg, twice /d+ levofloxacin 500mg, once /d (3mo)	Abdominal aorta replacement	Died of cerebrovascular accident after surgery (5y FU)
	Male – 60 – China	Worker, History of Pastoral Tourism (China)	Smoking	Fever, abdominal pain	Not specified	+	+	+	Abdominal aorta	Pseudoaneurysm	NR	Rif 600mg, once /d+ dox 100mg, twice /d+ levofloxacin 500mg, once /d (3mo)	Abdominal aorta replacement	Cured (7y FU)
	Male – 61 – China	Worker (China)	Smoking	Fever, chest and back pain	Not specified	+	NR	+	ascending aorta	Pseudoaneurysm	NR	Rif 600mg, once /d+ dox 100mg, twice /d+ levofloxacin 500mg, once /d (3mo)	Artificial vessel repair for false aneurysm of ascending aorta	Cured (7y FU)
	Male – 62 – China	Farmer, History of drinking raw goat milk (China)	Smoking	Fever, abdominal pain	Not specified	+	+	+	Abdominal aorta	Pseudoaneurysm	NR	Rif 600mg, once /d+ dox 100mg, twice /d+ levofloxacin 500mg, once /d (3mo)	Abdominal aorta replacement	Cured (4y FU)
	Female – 65 – China	Herdsmen, Cattle History (China)	No relevant history	Fever, abdominal pain	Not specified	+	+	+	Abdominal aorta	Pseudoaneurysm	NR	Rif 600mg once/day + dox 100mg twice/day + levofloxacin 500mg once/day (6mo)	Abdominal aorta replacement	Cured (3y FU)
	Male – 75 – China	Worker (China)	Smoking, hypertension	Fever	Not specified	+	NR	+	arcus aortae	Pseudoaneurysm	Blood-stained sputum	Rif 600mg once/day + dox 100mg twice/day + levofloxacin 500mg once/day (6mo)	No surgery performed	Improvement (3y FU)
	Male – 68 – China	Worker (China)	Smoking	Fever, abdominal pain	Not specified	+	NR	+	Abdominal aorta	Pseudoaneurysm	NR	Rif 600mg once/day + dox 100 mg twice/day + levofloxacin 500 mg once/day (NR)	No surgery performed	loss to follow-up
	Male – 58 – China	Farmer (China)	Smoking	Fever	Not specified	+	NR	+	arcus aortae	Pseudoaneurysm	NR	Rif 600mg once/day + dox 100mg twice/day + levofloxacin 500mg once/day (6mo)	TEVAR	Cured (6mo FU)
	Male – 66 – China	Farmer, Cattle History (China)	Smoking, hypertension , bladder cancer	Fever, abdominal pain	Not specified	+	NR	+	Abdominal aorta	Pseudoaneurysm	Epididymitis	Rif 600mg once/day + dox 100mg twice/day + levofloxacin 500mg once/day (6mo)	Abdominal aorta replacement	Cured (5mo FU)
Liu et al.79 2022	Female – 62 – China	Sheep (China)	Hypertension, arteriosclerosis, gastric ulcer	Abdominal pain	Not specified	+	NR	+	Abdominal aorta	Pseudoaneurysm	NR	Rifapentine 150 mg 1/3d + Minocycline hydrochloride capsule 100 mg 2/d (3mo)	No surgery performed	Cured (4mo FU)
Jiang et al.12 2023 15 cases	Male – 50 – China	NR	NR	Fever and back pain	NR	+	NR	NR	Abdominal aorta and right iliac artery	Ruptured pseudoaneurysm	NR	Dox 200mg+ Rif 600mg (26w)	EVAR	Cured (6mo FU)
	Male – 61 – China	Sheep (China)	NR	Fever and throbbing masses	Not specified	-	NR	+	Abdominal aorta	Ruptured pseudoaneurysm	NR	Dox 200mg+ Rif 600mg (26w)	EVAR	Cured (6mo FU)
	Male – 50 – China	Cattle (China)	Arteriosclerosis of the aorto-iliac artery	Ruptured aneurysm and shock	Not specified	-	NR	+	Abdominal aorta	Ruptured pseudoaneurysm	NR	Dox 200mg+ Rif 600mg (24w)	EVAR	Cured (6mo FU)
	Male – 75 – China	Sheep (China)	Arteriosclerosis of the aorto-iliac artery	Ruptured aneurysm and shock	Not specified	-	NR	+	right iliac artery	Ruptured pseudoaneurysm	NR	Dox 200mg+ Rif 600mg (25w)	EVAR	A distal right iliac artery rupture occurred 9 months after surgery and was cured after a second operation
	Male – 50 – China	Sheep (China)	NR	Ruptured aneurysm	Not specified	-	NR	+	Abdominal aorta	Ruptured pseudoaneurysm	NR	Dox 200mg+ Rif 600mg (24w)	EVAR	Cured (6mo FU)
	Male – 48 – China	Cattle (China)	NR	Fever and abdominal pain	NR	+	NR	NR	Abdominal aorta	Ruptured pseudoaneurysm	Endocarditis (aortic valve)	Dox 200mg+ Rif 600mg (24w)	EVAR	Cured (6mo FU)
	Male – 67 – China	Sheep (China)	Arteriosclerosis of the aorto-iliac artery	Throbbing masses	Not specified	-	NR	+	Abdominal aorta	Ruptured pseudoaneurysm	NR	Dox 200mg+ Rif 600mg (25w)	EVAR	Cured (6mo FU)
	Female – 50 – China	Cattle (China)	NR	Abdominal pain	Not specified	-	NR	+	Abdominal aorta	Ruptured pseudoaneurysm	NR	Dox 200mg+ Rif 600mg (25w)	EVAR	Cured (6mo FU)
	Female – 63 – China	Cattle (China)	NR	Throbbing masses	Not specified	-	NR	+	Left iliac artery	Ruptured pseudoaneurysm	NR	Dox 200mg+ Rif 600mg (26w)	EVAR	Cured (6mo FU)
	Male – 68 – China	Cattle (China)	Arteriosclerosis of the aorto-iliac artery	Throbbing masses	Not specified	-	NR	+	Abdominal aorta	Ruptured pseudoaneurysm	NR	Dox 200mg+ Rif 600mg (25w)	EVAR	Cured (6mo FU)
	Male – 52 – China	Sheep (China)	NR	Low back pain	Not specified	-	NR	+	Left iliac artery	Ruptured pseudoaneurysm	NR	Dox 200mg+ Rif 600mg (26w)	EVAR	Cured (6mo FU)
	Male – 69 – China	veterinarian (China)	Arteriosclerosis of the aorto-iliac artery	Ruptured aneurysm	Not specified	-	NR	+	Bilateral iliac arteries	Ruptured pseudoaneurysm	NR	Dox 200mg+ Rif 600mg (24w)	EVAR	A distal rupture of the left iliac artery occurred 33 months after surgery and was cured after a second operation
	Female – 64 – China	Cattle (China)	Arteriosclerosis of the aorto-iliac artery	Low back pain	Not specified	-	NR	+	Abdominal aorta and right iliac artery	Ruptured pseudoaneurysm	NR	Dox 200mg+ Rif 600mg (24w)	EVAR	Cured (6mo FU)
	Male – 66 – China	Sheep (China)	Arteriosclerosis of the aorto-iliac artery	Fever and abdominal pain	Not specified	-	NR	+	Abdominal aorta	Ruptured pseudoaneurysm	NR	Dox 200mg+ Rif 600mg (26w)	EVAR	Cured (6mo FU)
	Male – 57 – China	Cattle (China)	NR	Ruptured aneurysm	Not specified	-	NR	+	Abdominal aorta	Ruptured pseudoaneurysm	NR	Dox 200mg+ Rif 600mg (24w)	EVAR	Cured (6mo FU)
Wang et al.16 2023 13 cases	Male – 70 – China	Sheep (China)	Smoking, alcohol abuse, arteriosclerosis of the aorto-iliac arteries	Fever, abdominal pain, nausea and vomiting	NR	+	NR	+	Abdominal aorta and right iliac artery	arterial aneurysm	NR	Dox 0.2g /d (12w) + Rif 0.2g /d (12w)	EVAR	Cured (NR)
	Male – 59 – China	Sheep (China)	Hypertension, smoking, arteriosclerosis of the aorto-iliac arteries	Fever, abdominal pain	NR	+	NR	+	Abdominal aorta	arterial aneurysm	NR	Dox 0.2g /d (12w) + Rif 0.6g /d (12w) + Levofloxacin 0.5g /d (12w)	No surgery performed	Cured (NR)
	Male – 49 – China	Cat, dog (China)	Smoking, alcohol abuse	Fever, abdominal pain, lower back pain	NR	+	NR	+	Abdominal aorta and bilateral iliac arteries	arterial aneurysm	NR	Rif 0.6g /d (8w) + Docilop 0.2g /d (8w)	EVAR	Brucellosis recurred 12 months after surgery and recovered after anti-brucellosis treatment
	Male – 64 – China	Chef (China)	Hypertension, smoking, alcohol abuse, arteriosclerosis of the aorto-iliac arteries	Fever, lower back pain	Not specified	-	NR	+	Left iliac artery	arterial aneurysm	NR	Dox 0.2g /d (16w) + Rif 0.6g /d (16w)	Endovascular graft exclusion	Cured (NR)
	Female – 65 – China	NR	Hypertension, smoking	Fever, abdominal pain	Not specified	-	NR	+	Abdominal aorta and bilateral iliac arteries	arterial aneurysm	NR	Dox 0.2g /d (24w) + Rif 0.6g /d (24w)	EVAR	Cured (NR)
	Male – 72 – China	Sheep (China)	Smoking, alcohol abuse, arteriosclerosis of the aorto-iliac arteries	Fever, chest and abdominal pain	NR	+	NR	+	Abdominal aorta	arterial aneurysm	NR	Rif 0.6g /d (12w) + Dox 0.2g /d (12w) + Levofloxacin 0.5g /d (12w)	EVAR	Brucellosis recurred 15 months after operation and recovered after anti-brucellosis treatment
	Male – 64 – China	Wool factory worker (China)	Smoking, alcohol abuse, arteriosclerosis of the aorto-iliac arteries	Fever, abdominal pain	NR	+	NR	+	Abdominal aorta and bilateral iliac arteries	arterial aneurysm	NR	Rif 0.6g /d (8w) + Dox 0.2g /d (8w)	EVAR	Brucellosis recurred 6 months after operation and recovered after anti-brucellosis treatment
	Male – 63 – China	Drinking raw milk (China)	Hypertension, smoking, alcohol abuse, arteriosclerosis of the aorto-iliac arteries	Fever, abdominal pain	Not specified	-	NR	+	Abdominal aorta	arterial aneurysm	NR	Rif 0.6g /d+ Dox 0.2g /d+ bicyclol 75mg /d+ Levofloxacin 0.5g /d (NR)	EVAR	Cured (NR)
	Male – 48 – China	Dog (China)	Hypertension, smoking, alcohol abuse, arteriosclerosis of the aorto-iliac arteries	Lumbar discomfort	Not specified	-	NR	+	Left iliac artery	arterial aneurysm	NR	Rif 0.6g /d+ Dox 0.2g /d+ ceftriaxone 2g /d+ Levofloxacin 0.5g /d (NR)	EVAR	Cured (NR)
	Male – 74 – China	Sheep, dog(China)	Smoking	Abdominal pain, nausea, abdominal pain, vomiting of blood	Not specified	-	NR	+	Abdominal aorta and right iliac artery	arterial aneurysm	NR	Rif 0.6g /d+ Dox 0.2g /d+ Levofloxacin 0.5g /d (NR)	EVAR	Cured (NR)
	Male – 66 – China	NR	Smoking, alcohol abuse, arteriosclerosis of the aorto-iliac arteries	Abdominal pain	Not specified	-	NR	+	Abdominal aorta and bilateral iliac arteries	arterial aneurysm	NR	Rif 0.6g /d+ Dox 0.2g /d+ Levofloxacin 0.5g /d (NR)	EVAR	Cured (NR)
	Male – 63 – China	NR	Hypertension, smoking, alcohol abuse, arteriosclerosis of the aorto-iliac arteries	Abdominal pain, fever, nausea, vomiting	Not specified	-	NR	+	thoracic aorta	arterial aneurysm	NR	Rif 0.6g /d + Dox 0.2g /d + gentamicin sulfate Injection 160,000 U (NR)	EVAR	Cured (NR)
	Male – 52 – China	NR	Smoking	Fever, lumbar discomfort	Not specified	-	NR	+	Abdominal aorta	arterial aneurysm	NR	Rif 0.6g /d+ Dox 0.2g /d+ Ceftriaxone 2g /d (NR)	EVAR	Cured (NR)
Li et al.81 2023 2 cases	Female – 65 – China	Sheep (China)	Brucellosis	Chest pain	Not specified	-	NR	-	Thoracic aorta	Pseudoaneurysm	NR	No anti-brucellosis treatment	TEVAR	Cured (2mo FU)
	Male – 64 – China	Sheep (China)	Brucellosis	Abdominal pain	Not specified	-	NR	-	Abdominal aorta	Pseudoaneurysm	NR	No anti-brucellosis treatment	EVAR	Cured (10w FU)
Eidt et al.80 2023	Female – 48 – U.S.A.	Wild Boar (U.S.A.)	NR	Abdominal pain	B suis.	+	+	+	Abdominal aorta	Pseudoaneurysm	NR	Dox + rif (18mo)	Autovenous replacement of abdominal aorta	Cured (3y FU)
Guo et al.82 2023	Male – 65 – China	Butcher (China)	Brucellosis	Fever, hoarseness	Not specified	NR	NR	+	Thoracic aorta	Pseudoaneurysm	NR	Dox + rif (4mo)	Thoracic aorta artificial vascular replacement	Cured (6w FU)
Eltayeb et al.98 2023	Male – 39 – Saudi Arabia	Drinking raw milk (NR)	Cerebral infarction	Fever	Not specified	+	+	+	Ascending aorta	Pseudoaneurysm	endocarditis	Gentamicin and rif (6mo)	Bentall operation	Cured (6mo FU)
Ma et al.85 2023 5 cases	Male – 70 – China	Farmer, cattle and sheep (China)	Hypertension, left lower extremity deep vein thrombosis	Fever, low back pain, weakness	Not specified	+	NR	+	Abdominal aorta and right common iliac artery	Pseudoaneurysm	Discitis	Rif + dox + Cefuroxime (6mo)	EVAR	Cured (23mo FU)
	Female – 61 – China	Farmer, cattle and sheep (China)	Hypertension	Abdominal pain, weakness	Not specified	NR	NR	+	Abdominal aorta	Pseudoaneurysm	NR	Rif + dox + cefixime (NR)	EVAR	Cured (6mo FU)
	Male – 55 – China	Raw beef and mutton (China)	NR	Abdominal pain, low back pain, weakness	Not specified	NR	NR	+	Left iliac artery	Pseudoaneurysm	NR	Rif + dox + cefixime (NR)	EVAR	Cured (12mo FU)
	Male – 47 – China	Contact Raw milk (China)	NR	Fever, abdominal pain, low back pain	Not specified	NR	NR	+	Abdominal aorta	Arterial aneurysm	NR	Rif + dox + cefixime (NR)	EVAR	Cured (5mo FU)
	Male – 54 – China	Sheep (China)	NR	Fever, abdominal pain, low back pain	Not specified	NR	NR	+	Abdominal aorta and right common iliac artery	Arterial aneurysm	NR	Rif + dox + cefixime (NR)	EVAR	Cured (4mo FU)
Perry et al.87 2023	Male – 68 – U.S.A.	Wild Boar (U.S.A.)	Hypertension, coronary heart disease, smoking	Abdominal pain, low back pain	Not specified	+	+	+	Abdominal aorta	Pseudoaneurysm	NR	Dox and azithromycin (NR)	Resection of abdominal aorta, right axillary arterio-bilateral femoral artery artificial hemangioma	Cured (2y FU)
Li et al.90 2023 4 cases	Male – 79 – China	Sheep and Cattle (China)	No relevant history	Abdominal pain	Not specified	+	NR	+	Abdominal aorta	Pseudoaneurysm	NR	Rif 450mg, 2/ day + dox 200mg, 1/ day (6mo)	EVAR	Death (due to gastrointestinal bleeding 10 months after surgery)
	Male – 67 – China	Sheep (China)	Gout	low back pain	Not specified	+	NR	+	Abdominal aorta	Pseudoaneurysm	NR	Rif 450mg, 2/ day + dox 200mg, 1/ day (6mo)	EVAR	Cured (5m FU)
	Female – 58 – China	Sheep (China)	Brucellosis	Abdominal pain	Not specified	NR	NR	+	Abdominal aorta	Pseudoaneurysm	NR	Rif 450mg, 2/ day + dox 200mg, 1/ day (6mo)	EVAR	Cured (18m FU)
	Male – 65 – China	Sheep (China)	No relevant history	Abdominal pain, low back pain	Not specified	+	NR	+	Abdominal aorta	Pseudoaneurysm	NR	Rif 450mg, 2/ day + dox 200mg, 1/ day (6mo)	EVAR	Cured (NR)
Abbreviations
AA: Abdominal aorta; CIA: Common iliac artery; EVAR: Endovascular aneurysm repair; D: Day ;Dox: doxycycline; FU: Follow-up; MO: Month; NR: Not reported; PE: Pulmonary edema; PTFE: Polytetrafluoroethylene; Rif: Rifampicine; SA: Saudi Arabia; TA: Thoracic aorta; UK: United Kingdom; USA: United States of America; Y: Year
